# Supplementary material for: Genome and Transcriptome Analysis of the Food-Yeast Candida utilis
Source: PubMed Central journal article supplement (PMC3356342; doi:10.1371/journal.pone.0037226), 2012-05-18
Supplement: pone.0037226.s007.pdf [file pone.0037226.s007.pdf]

**Table S1.** Overview of Pfam domains specific to *C. utilis* compared to nine other yeasts (*S. cerevisiae*, *S. pombe*, *P. stipitis*, *Y. lipolytica*, *A. gossypii*, *K. lactis*, *C. albicans*, *C. glabrata*, and *D. hansenii*).

| PfamID  | Pfam description                                         | Gene |
|---------|----------------------------------------------------------|------|
| PF09248 | Domain of unknown function (DUF1965)                     | 1    |
| PF02162 | XYPPX repeat (two copies)                                | 2    |
| PF05970 | PIF1 helicase                                            | 1    |
| PF03107 | C1 domain                                                | 1    |
| PF03476 | MOSC N-terminal beta barrel domain                       | 1    |
| PF03473 | MOSC domain                                              | 1    |
| PF05676 | NADH-ubiquinone oxidoreductase B18 subunit (NDUFB7)      | 1    |
| PF00089 | Trypsin                                                  | 1    |
| PF02391 | MoaE protein                                             | 1    |
| PF07156 | Prenylcysteine lyase                                     | 1    |
| PF09423 | PhoD-like phosphatase                                    | 1    |
| PF01967 | MoaC family                                              | 1    |
| PF06463 | Molybdenum Cofactor Synthesis C                          | 1    |
| PF00174 | Oxidoreductase molybdopterin binding domain              | 1    |
| PF03404 | Mo-co oxidoreductase dimerisation domain                 | 1    |
| PF08914 | Rap1 Myb domain                                          | 1    |
| PF02755 | RPEL repeat                                              | 1    |
| PF08445 | FR47-like protein                                        | 1    |
| PF03453 | MoeA N-terminal region (domain I and II)                 | 1    |
| PF03454 | MoeA C-terminal region (domain IV)                       | 1    |
| PF05336 | Domain of unknown function (DUF718)                      | 1    |
| PF07016 | Cysteine-rich acidic integral membrane protein precursor | 1    |
| PF05658 | Hep_Hag                                                  | 1    |
