# Supplementary material for: Genome and Transcriptome Analysis of the Food-Yeast Candida utilis
Source: PubMed Central journal article supplement (PMC3356342; doi:10.1371/journal.pone.0037226), 2012-05-18
Supplement: pone.0037226.s010.pdf [file pone.0037226.s010.pdf]

**Table S4.** KEGG pathways in which more than one tenth enzymatic genes were classified into highly expressed genes (uq > 10) at stationary-phase.

| Map ID     | Category                                    | Description                                 | The number of genes | The number of highly expressed genes at log-phase | The number of highly expressed genes at stationary-phase |
|------------|---------------------------------------------|---------------------------------------------|---------------------|---------------------------------------------------|----------------------------------------------------------|
| map00190   | Energy Metabolism                           | Oxidative phosphorylation                   | 12                  | 8                                                 | 11                                                       |
| * map00020 | Carbohydrate Metabolism                     | Citrate cycle (TCA cycle)                   | 22                  | 2                                                 | 16                                                       |
| * map00720 | Energy Metabolism                           | Reductive carboxylate cycle (CO2 fixation)  | 13                  | 2                                                 | 7                                                        |
| map00010   | Carbohydrate Metabolism                     | Glycolysis / Gluconeogenesis                | 44                  | 18                                                | 23                                                       |
| map01040   | Lipid Metabolism                            | Biosynthesis of unsaturated fatty acids     | 15                  | 5                                                 | 6                                                        |
| map00710   | Energy Metabolism                           | Carbon fixation in photosynthetic organisms | 25                  | 6                                                 | 10                                                       |
| map00524   | Biosynthesis of Other Secondary Metabolites | Butirosin and neomycin biosynthesis         | 16                  | 10                                                | 6                                                        |
| map00061   | Lipid Metabolism                            | Fatty acid biosynthesis                     | 20                  | 9                                                 | 7                                                        |
| map00290   | Amino acid Metabolism                       | Valine, leucine and isoleucine biosynthesis | 18                  | 8                                                 | 6                                                        |
| map00830   | Metabolism of Cofactors and Vitamins        | Retinol metabolism                          | 18                  | 5                                                 | 6                                                        |
| * map00592 | Lipid Metabolism                            | alpha-Linolenic acid metabolism             | 16                  | 4                                                 | 5                                                        |
| * map00624 | Xenobiotics Biodegradation and Metabolism   | 1- and 2-Methylnaphthalene degradation      | 17                  | 2                                                 | 5                                                        |
| map00540   | Glycan Biosynthesis and Metabolism          | Lipopolysaccharide biosynthesis             | 22                  | 5                                                 | 6                                                        |
| map00940   | Biosynthesis of Other Secondary Metabolites | Phenylpropanoid biosynthesis                | 30                  | 7                                                 | 8                                                        |
| map00250   | Amino acid Metabolism                       | Alanine, aspartate and glutamate metabolism | 43                  | 12                                                | 11                                                       |
| * map00640 | Carbohydrate Metabolism                     | Propanoate metabolism                       | 47                  | 4                                                 | 11                                                       |
| * map00903 | Metabolism of Terpenoids and Polyketides    | Limonene and pinene degradation             | 22                  | 2                                                 | 5                                                        |
| map00620   | Carbohydrate Metabolism                     | Pyruvate metabolism                         | 64                  | 10                                                | 14                                                       |
| map00030   | Carbohydrate Metabolism                     | Pentose phosphate pathway                   | 37                  | 5                                                 | 8                                                        |
| * map00071 | Lipid Metabolism                            | Fatty acid metabolism                       | 29                  | 4                                                 | 6                                                        |
| map00052   | Carbohydrate Metabolism                     | Galactose metabolism                        | 37                  | 5                                                 | 7                                                        |
| * map00650 | Carbohydrate Metabolism                     | Butanoate metabolism                        | 53                  | 4                                                 | 10                                                       |
| * map00630 | Carbohydrate Metabolism                     | Glyoxylate and dicarboxylate metabolism     | 58                  | 3                                                 | 9                                                        |
| map00500   | Carbohydrate Metabolism                     | Starch and sucrose metabolism               | 71                  | 11                                                | 11                                                       |
| * map00310 | Amino acid Metabolism                       | Lysine degradation                          | 54                  | 1                                                 | 8                                                        |
| * map00350 | Amino acid Metabolism                       | Tyrosine metabolism                         | 63                  | 6                                                 | 9                                                        |
| * map00680 | Energy Metabolism                           | Methane metabolism                          | 35                  | 3                                                 | 5                                                        |
| map00051   | Carbohydrate Metabolism                     | Fructose and mannose metabolism             | 65                  | 12                                                | 9                                                        |
| map00053   | Carbohydrate Metabolism                     | Ascorbate and aldarate metabolism           | 45                  | 7                                                 | 6                                                        |
| map00330   | Amino acid Metabolism                       | Arginine and proline metabolism             | 98                  | 10                                                | 12                                                       |
| map00260   | Amino acid Metabolism                       | Glycine, serine and threonine metabolism    | 58                  | 7                                                 | 7                                                        |
| map00360   | Amino acid Metabolism                       | Phenylalanine metabolism                    | 58                  | 7                                                 | 7                                                        |
| * map00380 | Amino acid Metabolism                       | Tryptophan metabolism                       | 67                  | 6                                                 | 8                                                        |
| * map00564 | Lipid Metabolism                            | Glycerophospholipid metabolism              | 52                  | 4                                                 | 6                                                        |
| map00520   | Carbohydrate Metabolism                     | Amino sugar and nucleotide sugar metabolism | 95                  | 13                                                | 10                                                       |

\* Pathways without being selected at log-phase.
